# **Aneuploidy facilitates dysplastic and tumorigenic phenotypes in the *Drosophila* gut**

Rita Brás<sup>1,2</sup>, Augusta Monteiro<sup>1,2</sup>, Claudio E. Sunkel<sup>1,2,3,#</sup>, Luís Pedro Resende<sup>1,2,#</sup>

<sup>1</sup> Instituto de Investigação e Inovação em Saúde, Universidade do Porto, Portugal

<sup>2</sup> IBMC - Instituto de Biologia Molecular e Celular, Universidade do Porto, Portugal

<sup>3</sup> ICBAS – Instituto de Ciências Biomédicas de Abel Salazar, Universidade do Porto

#To whom correspondence should be addressed:

Luís Pedro Resende

Claudio E. Sunkel

Postal address:

R. Alfredo Allen, 4200-135 Porto

Telephone number: +351 22 040 8800

Email Addresses:

luis.resende@ibmc.up.pt

cesunkel@ibmc.up.pt

Key words: cancer, mitosis, aneuploidy, stem cells, spindle-assembly checkpoint.

## Abstract

Aneuploidy has been strongly linked to cancer development, and published evidence has suggested that aneuploidy can have an oncogenic or a tumor suppressor role depending on the tissue context. Using the *Drosophila* midgut as a model, we have recently described that adult intestinal stem cells (ISCs), do not activate programmed cell death upon aneuploidy induction, leading to an increase in ISC proliferation rate, and tissue dysplasia. How aneuploidy impacts ISCs in intestinal tumorigenic models remains to be investigated, and it represents a very important biological question to address since data from multiple *in vivo* models suggests that the cellular impact of aneuploidy is highly dependent on the cellular and tissue context. Using manipulation of different genetic pathways such as EGFR, JAK-STAT and Notch that cause dysplastic phenotypes in the *Drosophila* gut, we found that concomitant aneuploidy induction by impairment of the Spindle Assembly Checkpoint (SAC) consistently leads to a more severe progression of intestinal dysplasia or tumorigenesis. This is characterized by an accumulation of progenitor cells, high tissue cell density and higher stem cell proliferation rates, revealing an additive or synergistic effect depending on the misregulated pathway in which aneuploidy was induced. Thus, our data suggests that in the *Drosophila* gut, both dysplasia and tumorigenic phenotypes can be fueled by inducing genomic instability of resident stem cells.

## Introduction

Aneuploidy corresponds to the cellular state in which the chromosome number is not a multiple of the haploid set. While during development, aneuploidy is often associated with embryonic lethality [1], some autosomal trisomies are viable [2], and its impact on adult cells is not necessarily detrimental, as aneuploid cells can be found in healthy tissues, such as the human brain [3, 4] and liver [5]. Furthermore, multiple studies have shown that aneuploidy is associated with aging, neurodegeneration and cancer. However, studies on aneuploidy have highlighted that, in order to understand its impact on cell-fate, factors such as the cell-type and tissue-context must be considered. Many studies have reported a detrimental impact of aneuploidy, leading to cellular stress, cell cycle arrest, or apoptosis [6, 7] but, in other circumstances, it has also been shown to lead to overproliferative phenotypes [8, 9]. More recently, work on aneuploidy and its relationship with cancer, has shown that the outcome in cell behavior is highly context-dependent [10]. Factors such as cell type, type of tumor, and the type/level of aneuploidy, have all been suggested to determine the impact of aneuploidy during tumorigenesis [11]. Given this context-dependent effect, it is particularly relevant to understand the cell-type specific response to aneuploidy. Embryonic stem cells have been proposed to tolerate and survive as aneuploid, contrary to most somatic cells [12, 13]. We and others have shown that adult stem cells can present a similar ability to survive and proliferate as aneuploid [14-16]. This characteristic of adult stem cells has a potentially strong physiological impact, due to their essential role in tissue maintenance.

This resistance of adult stem cells to aneuploidy has important implications in tumors where they can fuel tumor growth and resistance, functioning as reservoirs for genomic alterations that could have either a pro-oncogenic or tumor suppressor role.

The *Drosophila* intestine is an excellent model system to address the impact of aneuploidy on adult stem cells. It has a high degree of homology with mammals [17], it is amenable to genetic manipulations and multiple markers are available for all different cell types composing the midgut thus facilitating the characterization of epithelial phenotypes. The *Drosophila* intestine is maintained by the action of multipotent progenitor intestinal stem cells (ISCs) [18]. In addition to ISCs, Enteroblast (EBs) is another undifferentiated cell type in this tissue, while absorptive Enterocytes (ECs), and secretory Enteroendocrine cells (EEs) constitute the differentiated cell populations found in the intestine [19]. We have recently shown that induction of aneuploidy in *Drosophila* adult ISCs results in a dysplastic phenotype, resembling early

stages of tumorigenesis. Once aneuploid, ISCs accumulate and increase their proliferation rate, leading to a higher cell density within the tissue [16]. Differentiated EEs also accumulate in response to aneuploidy induction within ISCs, suggesting that aneuploidy also impacts the differentiation program. This data provided an *in vivo* model of how aneuploidy could lead to tissue pathology when induced in a healthy/homeostatic context. One of the most relevant questions opened with these findings was whether ISC capacity to survive and proliferate as aneuploid, was maintained by ISCs in an epithelial tumorigenic context, and, if so, what could be the impact of particular type of genomic instability in the progression of this phenotype.

Here, we report experiments describing the effect of inducing aneuploidy in different genetic contexts such as misregulation of EGFR, JAK-STAT and Notch. Aneuploidy was induced in these different genetic backgrounds of intestinal dysplasia and tumorigenesis by depleting SAC proteins. We find that induction of aneuploidy consistently led to a more severe dysplastic or tumorigenic phenotype, when compared to the phenotype observed upon misregulation of the developmental pathways or SAC alone. Our results suggest that in the context of a tumorigenic phenotype, induction of aneuploidy can promote tumor growth, and highlight the importance of more studies in the characterization of resident stem cells ploidy status within epithelial tumor, and its impact on tumor progression.

## Results and discussion

### **Intestinal dysplasia observed upon aneuploidy induction in ISCs/EBs is milder when compared the misregulation of EGFR or JAK-STAT.**

Our initial goal was to study the dysplastic phenotypes we have previously reported upon aneuploidy induction in homeostatic ISCs compared when compared with the phenotypes observed upon misregulation of different important developmental pathways, such as EGFR or JAK-STAT. To address this, we evaluated the impact of two alternative conditions of aneuploidy in the intestinal epithelia, and compared these phenotypes with the ones obtained in three independent conditions previously associated with dysplasia.

In this study, we used an already established and efficient strategy to induce aneuploid ISCs in *Drosophila*, through the impairment of the SAC [20]. The SAC is crucial for correct mitotic divisions, as it monitors faithful chromosome segregation ensuring proper cell cycle progression through anaphase. Our previous work demonstrated that inducing aneuploidy in ISCs, leads to stem cell accumulation and overproliferation [16].

To induce aneuploidy in ISCs/EBs, we resorted to the binary Gal4-UAS system [21], to express UAS-RNAi constructs against two alternative SAC genes (UAS-*mad2*RNAi or UAS-*mps1*RNAi) in ISCs/EBs, as previously [16]. A temperature sensitive repressor of the GAL4 system was used to block the expression of constructs during the development (flies were kept at 18°C until adults). Upon pupal eclosion, flies were shifted to 29°C in order to drive RNAi expression, allowing the induction of SAC impairment in the adult ISCs/EBs.

Intestinal dysplasia in *Drosophila* has been widely characterized by overproliferation of progenitor cells, an impaired differentiation, and changes in epithelial architecture and/or cell shape, being often associated with a pre-malignant state [22, 23]. In order to characterize the different phenotypes, we have evaluated epithelium alterations through quantification of the number of ISCs/EBs per total cell number, the number of mitotic cells, and the cellular density within the midgut. In agreement with our published results, when SAC was impaired either through a RNAi-mediated knockdown of *mps1* or *mad2*, we observed a significant accumulation of ISCs/EBs when compared to controls (Figure 1 A-C, G). Accordingly, intestines from flies expressing UAS-*mps1*RNAi or UAS-*mad2*RNAi presented a higher number of cells undergoing mitotic divisions (Figure 1 A-C, H), and an increase in epithelial cell density (Figure S1 A-C, M).

The EGFR and JAK-STAT pathways are crucial for stem cell regulation in the *Drosophila* intestine and manipulation of these pathways have been associated with dysplastic or tumorigenic phenotypes. The EGFR/RAS/MAPK is a well-characterized oncogenic pathway with multiple functions in cell behavior, and shown to be implicated in stem cell-derived epithelial cancers, including colorectal cancer [24]. In the fly midgut, the EGFR pathway plays an important role in the regulation of cell proliferation, growth and epithelial regeneration, and its dysregulation has been associated with tumorigenesis [25, 26]. Another important pathway for stem cell regulation in the midgut is the JAK-STAT pathway, fundamental for various developmental processes, such as the innate immune response, cellular proliferation, and stem cell development [27]. In the *Drosophila* intestine, this pathway acts as a mitogenic signal important to maintain

intestinal homeostasis but also to mediate stress-induced responses [28]. A sustained activation of the JAK-STAT pathway is considered as a causal event of tumorigenesis in both *Drosophila* and humans [29, 30].

To address the impact of the misregulation of these pathways in adult ISCs/EBs, we used the Gal4-UAS system, as described previously. Previous studies in *Drosophila* have reported an accumulation of ISCs, upon expression of UAS-raf or UAS-der-Ellipse (EGFR over-activation) [31, 32], or UAS-hop (JAK-STAT over-activation) [33, 34] in ISCs/EBs. We have confirmed these findings and observed that the expression of UAS-hop, UAS-raf or UAS-der-Ellipse in ISCs/EBs, all resulted in an increase in the accumulation of progenitor cells (Figure 1 D-G), higher levels of mitotic ISCs (Figure 1 D-F, H) and higher cellular density (Figure S1 D, G, J, M-P). Interestingly, the severity of the dysplasia observed was stronger in the situations where EGFR or JAK-STAT components were misregulated when compared to the aneuploidy conditions. One possible explanation for this observation could be linked to the fact that ISC/EB proliferation rate is relatively low under homeostatic conditions and mitotic divisions must occur for aneuploid ISCs/EBs to be generated upon SAC impairment. Furthermore, it is expected that only a fraction of those divisions results in mitotic errors that lead to aneuploid ISCs/EBs. Thus, it is expected that for the generation of a significant proportion of aneuploid ISCs/EBs in the midgut, several days are needed, and this is an important factor to be considered when comparing the severity of the dysplastic phenotypes in aneuploid conditions versus manipulation of JAK-STAT or EGFR.

### **Aneuploidy induction potentiates dysplasia observed upon EGFR and JAK-STAT misregulation.**

Previous studies have shown that the impact of aneuploidy in cell fate is highly complex, and that it depends greatly on the cellular and tissue context [11]. Therefore, an important question to address is what would be the impact on midgut epithelial phenotypes of inducing aneuploidy on a context of dysplasia. In order to investigate this, we co-expressed two constructs in ISCs/EBs: one construct to either over-activate the EGFR (UAS-raf or UAS-der-Ellipse) or over-activate the JAK-STAT (UAS-hop), to induce dysplasia, and another one to impair the SAC and induce aneuploidy (either UAS-mps1RNAi or UAS-mad2RNAi). This strategy allowed us to study six different combinations of genetic conditions where dysplasia was induced in combination with or without aneuploidy induction. Regarding EGFR misregulation via RAF over-expression, we observed that aneuploidy induction led to an increase in the number of ISCs/EBs, number of mitotic cells, and cell density when compared to the overexpression of Raf alone (Figure 2 A,B,E,G).

Consistently, induction of aneuploidy on the context of EGFR misregulation via an alternative gene (UAS-Der-Ellipse) also resulted in a more severe dysplasia than the one observed with UAS-der Ellipse alone (Figure S2 A-D). Thus, we can conclude that aneuploidy exacerbates the development of dysplasia caused by misregulation of the EGFR pathway.

In order to test if the impact of aneuploidy on the development of dysplastic phenotypes, observed on the context of EGFR manipulation, could be observed in other genetic contexts, we studied this on the context of dysplasia caused by JAK-STAT misregulation. For this purpose, we expressed UAS-hop in ISCs/EBs (JAK-STAT overactivation) while simultaneously induced aneuploidy with UAS-mps1RNAi or UAS-mad2RNAi. Flies where UAS-hop was simultaneously expressed with UAS-mps1RNAi or UAS-mad2RNAi showed a higher percentage of accumulation of ISCs/EBs, higher number of mitotic cells, and higher tissue cell density (Figure 2 C,D,F,H and Figure S1 J-L, P). Thus, aneuploidy induction led to an increase of the dysplasia observed with the UAS-hop alone. While clearly leading to a more severe epithelial phenotype, induction of aneuploidy acted mostly as an additive effect, when dysplasia was induced by misregulation of either the EGFR and JAK-STAT pathways. Accordingly, we can conclude that aneuploidy induction, in the context of misregulation of EGFR or JAK-STAT promotes the development of dysplasia.

### **Aneuploidy induction in ISCs/EBs potentiates the development of the tumorigenic phenotype caused by Notch loss-of-function.**

The dysplasia phenotypes observed upon EGFR or JAK-STAT manipulation are often portrayed as models for early stages of tumor development, and these can be distinguished from the phenotype observed in the midgut upon manipulation of Notch, another important developmental pathway. Notch is an evolutionarily conserved cell signaling pathway, essential for stem cell maintenance [35] and cell fate determination across different developing tissues and organs [36, 37]. In the *Drosophila* midgut, the level of Notch activity between ISCs that contain the Delta ligand, and the neighboring EB containing the Notch receptor has a determinant role in stem cell fate [38, 39]. Mutations that inhibit differentiation in stem cell lineages have been reported in early steps of cancer development [40], and in the fly intestine, it has been reported that suppression of Notch signaling results in tumor initiation [41]. More particularly, in the *Drosophila* midgut, Notch loss-of-function has been shown to lead to the formation of clusters of ISC-like cells that fail to differentiate and proliferate at a very high rate. While EGFR or Jak/Stat overactivation have been

associated with a dysplastic phenotype in the fly midgut, Notch downregulation has been characterized as a neoplastic growth. Therefore, we decided to address whether aneuploidy could also have an impact on this model. Firstly, and to test whether we could observe the reported Notch loss-of-function epithelial phenotypes [41], we expressed a UAS-notchRNAi construct in ISCs/EBs during the first 10 days of the adult life. After 10 days of expressing UAS-notchRNAi in ISCs/EBs, we observed a very strong epithelial phenotype, characterized by a striking accumulation of GFP positive cells that formed several clusters across the midgut, and a very high number of mitotic cells per intestine (Figure 3 A, D-F). This phenotype could easily be distinguished from the ones observed upon aneuploidy induction or EGFR or JAK-STAT manipulation (Figure 1 A), as clusters of a very high number of ISCs/EBs were found in the midgut epithelium (Figure 3 A). The quantification of ISCs/EBs in this phenotype proved to be impossible due to the large number of GFP positive cells, therefore we opted to quantify the severity of the tumorigenic phenotype by the number of intestines that presented a clear tumorigenic appearance (several clusters with large numbers of ISCs/EBs), the percentage of these areas per total area of the midgut, and the number of mitotic cells per midgut. After NotchRNAi expression, we found that 80% of the intestines analyzed presented the phenotype previously described in the literature, with ISCs-like clusters across the midgut (Figure 3 A, D). On average, 20% of the total area of the midgut was occupied by these clusters (Figure 3 E). Moreover, the majority of the Notch depleted intestines analyzed had a number of mitotic cells significantly higher when compared to controls and to the other dysplastic conditions (Figure 1 H and Figure 3 A, F). We then proceeded to induce Notch downregulation while simultaneously inducing aneuploidy, as described before for the JAK-STAT and EGFR experiments. Aneuploidy induction in ISCs/EBs had a strong and synergistic impact on the severity of the phenotype caused by Notch downregulation. All intestines had a tumorigenic phenotype (Figure 3 A-D), presented a clear increase in the area occupied by these tumorigenic clusters (Figure 3 A-C, E), and in the number of mitotic cells per intestine (Figure 3 A-C, F). According to a previous study, Notch-defective ISCs require stress-induced divisions for tumor initiation [41]. Based on these results, we can speculate that aneuploidy might be acting as a source of stress and increase the malignant behavior of ISCs/EBs. Importantly, we could conclude that aneuploidy also exacerbated the development of a neoplastic phenotype. In our experiments, we observed that in EGFR, JAK-STAT tumor models it revealed to have an additive effect, while it had a clear synergistic effect in the case of Notch tumors. Since the biology of these tumors is well understood to be different, being the EGFR, JAK-STAT tumor phenotypes characterized as dysplastic, while Notch tumors are



characterized as neoplastic, we speculate this might explain the difference between the additive and synergistic effects of aneuploidy. Future studies should focus on what types of aneuploid genotypes (specific unbalanced chromosomes) in particular are responsible for this effect and on how different pathways cross-talk to increase ISC proliferation. One possible mechanism, might involve the JNK pathway as both aneuploidy induction and EGFR activation have been shown to lead to overactivation of this stress pathway and this overactivation was shown to be necessary for ISC proliferation [16, 42].

In this work, we characterized the impact of inducing aneuploidy in ISCs, under homeostatic conditions and under contexts of misregulation of developmental pathways associated with dysplastic and tumorigenic phenotypes in the gut. We show that aneuploidy induction in ISCs potentiates the development of intestinal dysplasia and tumorigenic phenotypes driven by misregulation of pathways such as JAK-STAT, EGFR and Notch. Aneuploidy is a source of genomic variability, which has been suggested to confer phenotypic advantages allowing a better adaptation of malignant cells to changing environments [43]. Consistently, aneuploidy correlates with resistance to antineoplastic treatments [44] and metastatic behavior [45]. However, there is a great complexity of the phenotypes conveyed by aneuploidy, since it is highly dependent on the type of cancer cells, tissue type and on the tumor microenvironment [46, 47]. Our work strongly suggests that *Drosophila* midgut stem cells might play a key role in the unveiling of this paradox. In the context of the experiments described here, and the impact of aneuploidy under dysplastic / tumorigenic contexts, we have not addressed a putative non-autonomous contribution of aneuploid stem cell progeny on promoting tumor progression. However, we have previously shown that under homeostatic conditions, the impact of aneuploidy in ISC behavior is driven by an autonomous up-regulation of JNK [16], as this damage sensing pathway was found to be overactivated in ISCs upon aneuploidy induction and preventing this up-regulation specifically in ISCs was sufficient to rescue the dysplastic phenotype. This, together with the fact that ISCs are the only dividing cells in the *Drosophila* intestinal epithelium, represents evidence towards an autonomous effect of aneuploidy to increase the severity of the tumor models here addressed, while future experiments could be planned to address a putative contribution of secreted signals from differentiated progeny to ISCs. When comparing and contrasting our findings in *Drosophila* with mammalian models, one factor to consider is the fact that the *Drosophila* genome is distributed in four chromosomes, a reduced number compared to 23 in humans, or 20 in mice. However, this difference does not seem to have a major impact on how aneuploidy impacts cell biology as *Drosophila* was used as a model for seminal discoveries on the impact of aneuploidy in cell physiology [48,49], and also on the link between

aneuploidy and tumor development. Further studies should focus on the characterization of the specific response of stem cells to chromosomal imbalances in different tissues and model organisms, contributing to a better understanding of how aneuploidy impacts human pathologies.

## **Material and Methods**

### ***Drosophila* stocks and husbandry**

Flies were maintained on standard cornmeal-molasses-agar medium. Only female progeny from experimental crosses were collected. Less than 30 flies per vial were maintained and turned onto fresh food vials every two days. The following fly stocks used were from the Bloomington *Drosophila* Stock Center (BDSC), Vienna *Drosophila* Stock Center (VDRC), or generous gifts from the fly community as indicated: UAS-mad2RNAi #106003, UAS-mps1RNAi #35283 or #36658, UAS-raf#2033, UAS-hop#14437, UAS-der-ellipse #9533 (Bloomington stock center); UAS-mad2RNAi#44430, UAS-notchRNAi#27229 (Vienna *Drosophila* Resource Centre); esgGal4,UASGFP;Gal80ts (gifts from Dr Leanne Jones, UCLA); Wild-type flies were Oregon R. A more detailed information about these stocks is found at Flybase (<http://flybase.bio.indiana.edu>).

### **Immunostaining, microscopy and data analysis**

The Immunofluorescence (IF) protocol was performed on whole-mount intestines directly dissected in 4% PFA and left ON at 4°C for fixation. After this fixation, three 10-minute washing procedures with PBST (PBS 0,1% triton) were carried out and then samples were incubated for 1 hour with a blocking solution of PBST/BSA (PBS 0,1% triton 1% BSA). An incubation with primary antibodies was followed, ON and at 4°C. Primary antibodies included: mouse anti-armadillo (1:20) and mouse anti-prospero (1:100) (Developmental Studies Hybridoma Bank, developed under the auspices of the National Institute of Child Health and Human Development and maintained by The University of Iowa, Department of Biological Sciences); rabbit anti-phospho-histone H3 (1:2500) (Millipore); rabbit anti-GFP (1:5000) (Molecular Probes). After this ON incubation, three 10-minute washes with PBST were performed and intestines were incubated for two hours with secondary antibodies. Secondary antibodies were diluted 1:500 (Molecular

Probes). Finally, other three 10-minute washes with PBST were performed and intestines were mounted in Vectashield mounting medium with DAPI (Vector Laboratories).

Microscopy analysis, of fixed and stained tissues was performed using a 1.1 numerical aperture/40x water objective on an inverted laser scanning confocal microscope Leica TCS SP5 II (Leica Microsystems). The software Leica Application Suite (LAS) Advance Fluorescence 2.6.

The first 2 fields of view of the posterior midgut (after the pyloric ring) were acquired with a 40x water objective, corresponding to the P3-P4 regions [50] or R4-R5 region [51]. Images were taken from both top and bottom layers of the intestines. The N mentioned in this work, corresponds to the number of intestines analyzed. For each intestine, corresponding to an individual N, 4 images on 40x objective were taken and used for quantifications: 2 images from the first field of view (top and bottom) plus two images from the second field of view (top and bottom). A minimum of 20 intestines were analysed from at least two biological replicates – progeny from different crosses, and at least 10 of those intestines were used for quantifications. All images were analyzed and edited in the LAS 2.6, and ImageJ 1.50i softwares; illustrative schemes were obtained with Adobe Illustrator CC 2018; statistical analysis and graphical display were performed using the Prism 7 (GraphPad) software.

## Acknowledgements

The authors thank Leanne Jones, Carla Lopes, Bruce Edgar, Renata Basto, Paulo Pereira, Jan Larsson, and S. Hou laboratories, and the Vienna *Drosophila* RNAi Center for reagents and stocks. This article is a result of the project Norte-01-0145-FEDER-000029 - Advancing Cancer Research: From basic knowledge to application, supported by Norte Portugal Regional Operational Programme (NORTE 2020), under the PORTUGAL 2020 Partnership Agreement, through the European Regional Development Fund (ERDF) and it is also funded by National Funds through FCT – Fundação para a Ciência e a Tecnologia under the project PTDC/BEX-BCM/1921/2014. The authors declare no competing financial interests.

## Author Contributions

R.B., L.P.R. and C.E.S planned experiments. R.B., L.P.R. and A.M. performed the experiments and together with C.E.S performed data analysis. R.B., L.P.R. and C.E.S wrote and edited the manuscript.

## Abbreviations list

EB – enteroblast, EC – enterocyte; EE – enteroendocrine; Esg – escargot; GFP – green fluorescent protein; ISC – intestinal stem cell; pH3 – phospho-histone 3; SAC – spindle-assembly checkpoint; EGFR - Epidermal Growth Factor Receptor; JAK- Janus Kinase; CIN – Chromosomal Instability

## References

1. Gug, C., et al., *Incidence and Spectrum of Chromosome Abnormalities in Miscarriage Samples: A Retrospective Study of 330 Cases*. Cytogenet Genome Res, 2019. **158**(4): p. 171-183.
2. Hassold, T.J. and P.A. Jacobs, *Trisomy in man*. Annu Rev Genet, 1984. **18**: p. 69-97.
3. Rehen, S.K., et al., *Constitutional aneuploidy in the normal human brain*. J Neurosci, 2005. **25**(9): p. 2176-80.
4. Bushman, D.M. and J. Chun, *The genomically mosaic brain: aneuploidy and more in neural diversity and disease*. Semin Cell Dev Biol, 2013. **24**(4): p. 357-69.
5. Duncan, A.W., et al., *Frequent aneuploidy among normal human hepatocytes*. Gastroenterology, 2012. **142**(1): p. 25-8.
6. Ohashi, A., et al., *Aneuploidy generates proteotoxic stress and DNA damage concurrently with p53-mediated post-mitotic apoptosis in SAC-impaired cells*. Nature Communications, 2015. **6**(1): p. 7668.
7. Zhu, J., et al., *Cellular Stress Associated with Aneuploidy*. Dev Cell, 2018. **44**(4): p. 420-431.
8. Torres, E.M., et al., *Identification of aneuploidy-tolerating mutations*. Cell, 2010. **143**(1): p. 71-83.
9. Chen, G., B. Rubinstein, and R. Li, *Whole chromosome aneuploidy: big mutations drive adaptation by phenotypic leap*. Bioessays, 2012. **34**(10): p. 893-900.
10. Ben-David, U. and A. Amon, *Context is everything: aneuploidy in cancer*. Nat Rev Genet, 2019.
11. Giam, M. and G. Rancati, *Aneuploidy and chromosomal instability in cancer: a jackpot to chaos*. Cell Div, 2015. **10**: p. 3.
12. Mantel, C., et al., *Checkpoint-apoptosis uncoupling in human and mouse embryonic stem cells: a source of karyotypic instability*. Blood, 2007. **109**(10): p. 4518-4527.
13. Ben-David, U., et al., *Aneuploidy induces profound changes in gene expression, proliferation and tumorigenicity of human pluripotent stem cells*. Nature Communications, 2014. **5**: p. 4825.
14. Mirkovic, M., et al., *Induced aneuploidy in neural stem cells triggers a delayed stress response and impairs adult life span in flies*. PLoS Biol, 2019. **17**(2): p. e3000016.
15. Harper, L.J., et al., *Normal and malignant epithelial cells with stem-like properties have an extended G2 cell cycle phase that is associated with apoptotic resistance*. BMC Cancer, 2010. **10**(1): p. 166.
16. Resende, L.P., et al., *Aneuploidy in intestinal stem cells promotes gut dysplasia in Drosophila*. The Journal of Cell Biology, 2018.
17. Reiter, L.T., et al., *A systematic analysis of human disease-associated gene sequences in Drosophila melanogaster*. Genome Res, 2001. **11**(6): p. 1114-25.
18. Ohlstein, B. and A. Spradling, *The adult Drosophila posterior midgut is maintained by pluripotent stem cells*. Nature, 2006. **439**(7075): p. 470-4.
19. Biteau, B., C.E. Hochmuth, and H. Jasper, *Maintaining tissue homeostasis: dynamic control of somatic stem cell activity*. Cell stem cell, 2011. **9**(5): p. 402-411.
20. Musacchio, A. and E.D. Salmon, *The spindle-assembly checkpoint in space and time*. Nat Rev Mol Cell Biol, 2007. **8**(5): p. 379-93.
21. Caygill, E.E. and A.H. Brand, *The GAL4 System: A Versatile System for the Manipulation and Analysis of Gene Expression, in Drosophila: Methods and Protocols*, C. Dahmann, Editor. 2016, Springer New York: New York, NY. p. 33-52.
22. Apidianakis, Y. and L.G. Rahme, *Drosophila melanogaster as a model host for studying Pseudomonas aeruginosa infection*. Nat Protoc, 2009. **4**(9): p. 1285-94.
23. Apidianakis, Y. and L.G. Rahme, *Drosophila melanogaster as a model for human intestinal infection and pathology*. Dis Model Mech, 2011. **4**(1): p. 21-30.

24. Miyamoto, Y., K. Suyama, and H. Baba, *Recent Advances in Targeting the EGFR Signaling Pathway for the Treatment of Metastatic Colorectal Cancer*. Int J Mol Sci, 2017. **18**(4).
25. Biteau, B. and H. Jasper, *EGF signaling regulates the proliferation of intestinal stem cells in Drosophila*. Development, 2011. **138**(6): p. 1045.
26. Cordero, J.B., et al., *Non-autonomous crosstalk between the Jak/Stat and Egfr pathways mediates Apc1-driven intestinal stem cell hyperplasia in the Drosophila adult midgut*. Development, 2012. **139**(24): p. 4524.
27. Rawlings, J.S., K.M. Rosler, and D.A. Harrison, *The JAK/STAT signaling pathway*. Journal of Cell Science, 2004. **117**(8): p. 1281.
28. Jiang, H., et al., *Cytokine/Jak/Stat signaling mediates regeneration and homeostasis in the Drosophila midgut*. Cell, 2009. **137**(7): p. 1343-1355.
29. Amoyel, M., A.M. Anderson, and E.A. Bach, *JAK/STAT pathway dysregulation in tumors: a Drosophila perspective*. Seminars in cell & developmental biology, 2014. **28**: p. 96-103.
30. Trivedi, S. and M. Starz-Gaiano, *Drosophila Jak/STAT Signaling: Regulation and Relevance in Human Cancer and Metastasis*. Int J Mol Sci, 2018. **19**(12).
31. Patel, P.H. and B.A. Edgar, *Tissue design: How Drosophila tumors remodel their neighborhood*. Seminars in Cell & Developmental Biology, 2014. **28**: p. 86-95.
32. Ma, M., et al., *Wildtype adult stem cells, unlike tumor cells, are resistant to cellular damages in Drosophila*. Developmental biology, 2016. **411**(2): p. 207-216.
33. Markstein, M., et al., *Systematic screen of chemotherapeutics in Drosophila stem cell tumors*. Proc Natl Acad Sci U S A, 2014. **111**(12): p. 4530-5.
34. Ren, W., et al., *Windpipe Controls Drosophila Intestinal Homeostasis by Regulating JAK/STAT Pathway via Promoting Receptor Endocytosis and Lysosomal Degradation*. PLOS Genetics, 2015. **11**(4): p. e1005180.
35. Liu, J., et al., *Notch signaling in the regulation of stem cell self-renewal and differentiation*. Curr Top Dev Biol, 2010. **92**: p. 367-409.
36. Artavanis-Tsakonas, S., M.D. Rand, and R.J. Lake, *Notch signaling: cell fate control and signal integration in development*. Science, 1999. **284**(5415): p. 770-6.
37. Siebel, C. and U. Lendahl, *Notch Signaling in Development, Tissue Homeostasis, and Disease*. Physiol Rev, 2017. **97**(4): p. 1235-1294.
38. Ohlstein, B. and A. Spradling, *Multipotent Drosophila Intestinal Stem Cells Specify Daughter Cell Fates by Differential Notch Signaling*. Science, 2007. **315**(5814): p. 988.
39. Perdigoto, C.N., F. Schweisguth, and A.J. Bardin, *Distinct levels of Notch activity for commitment and terminal differentiation of stem cells in the adult fly intestine*. Development, 2011. **138**(21): p. 4585.
40. Huang, Z., et al., *Differentiation and transdifferentiation potentials of cancer stem cells*. Oncotarget, 2015. **6**(37): p. 39550-39563.
41. Patel, P.H., D. Dutta, and B.A. Edgar, *Niche appropriation by Drosophila intestinal stem cell tumours*. Nat Cell Biol, 2015. **17**(9): p. 1182-92.
42. Biteau, B. and H. Jasper, *EGF signaling regulates the proliferation of intestinal stem cells in Drosophila*. Development (Cambridge, England), 2011. **138**(6): p. 1045-1055.
43. Negrini, S., V.G. Gorgoulis, and T.D. Halazonetis, *Genomic instability--an evolving hallmark of cancer*. Nat Rev Mol Cell Biol, 2010. **11**(3): p. 220-8.
44. Lee, A.J.X., et al., *Chromosomal Instability Confers Intrinsic Multidrug Resistance*. Cancer Research, 2011. **71**(5): p. 1858.
45. Bakhoun, S.F., et al., *Chromosomal instability drives metastasis through a cytosolic DNA response*. Nature, 2018. **553**(7689): p. 467-472.
46. Hoevenaar, W.H.M., et al., *Degree and site of chromosomal instability define its oncogenic potential*. Nature communications, 2020. **11**(1): p. 1501-1501.
47. Ben-David, U. and A. Amon, *Context is everything: aneuploidy in cancer*. Nat Rev Genet, 2020. **21**(1): p. 44-62.
48. Birchler J.A. *Aneuploidy in plants and flies: The origin of studies of genomic imbalance*. Seminars in Cell & Developmental Biology, 2013. **24**(4):315-9

49. Milán M et al. Aneuploidy and tumorigenesis in *Drosophila*. *Seminars in Cell & Developmental Biology*, 2014. Apr; 28:110-5
50. Marianes, A. and A.C. Spradling, *Physiological and stem cell compartmentalization within the Drosophila midgut*. *Elife*, 2013. **2**: p. e00886.
51. Buchon, N., et al., *Morphological and molecular characterization of adult midgut compartmentalization in Drosophila*. *Cell Rep*, 2013. **3**(5): p. 1725-38.



Figure Legends

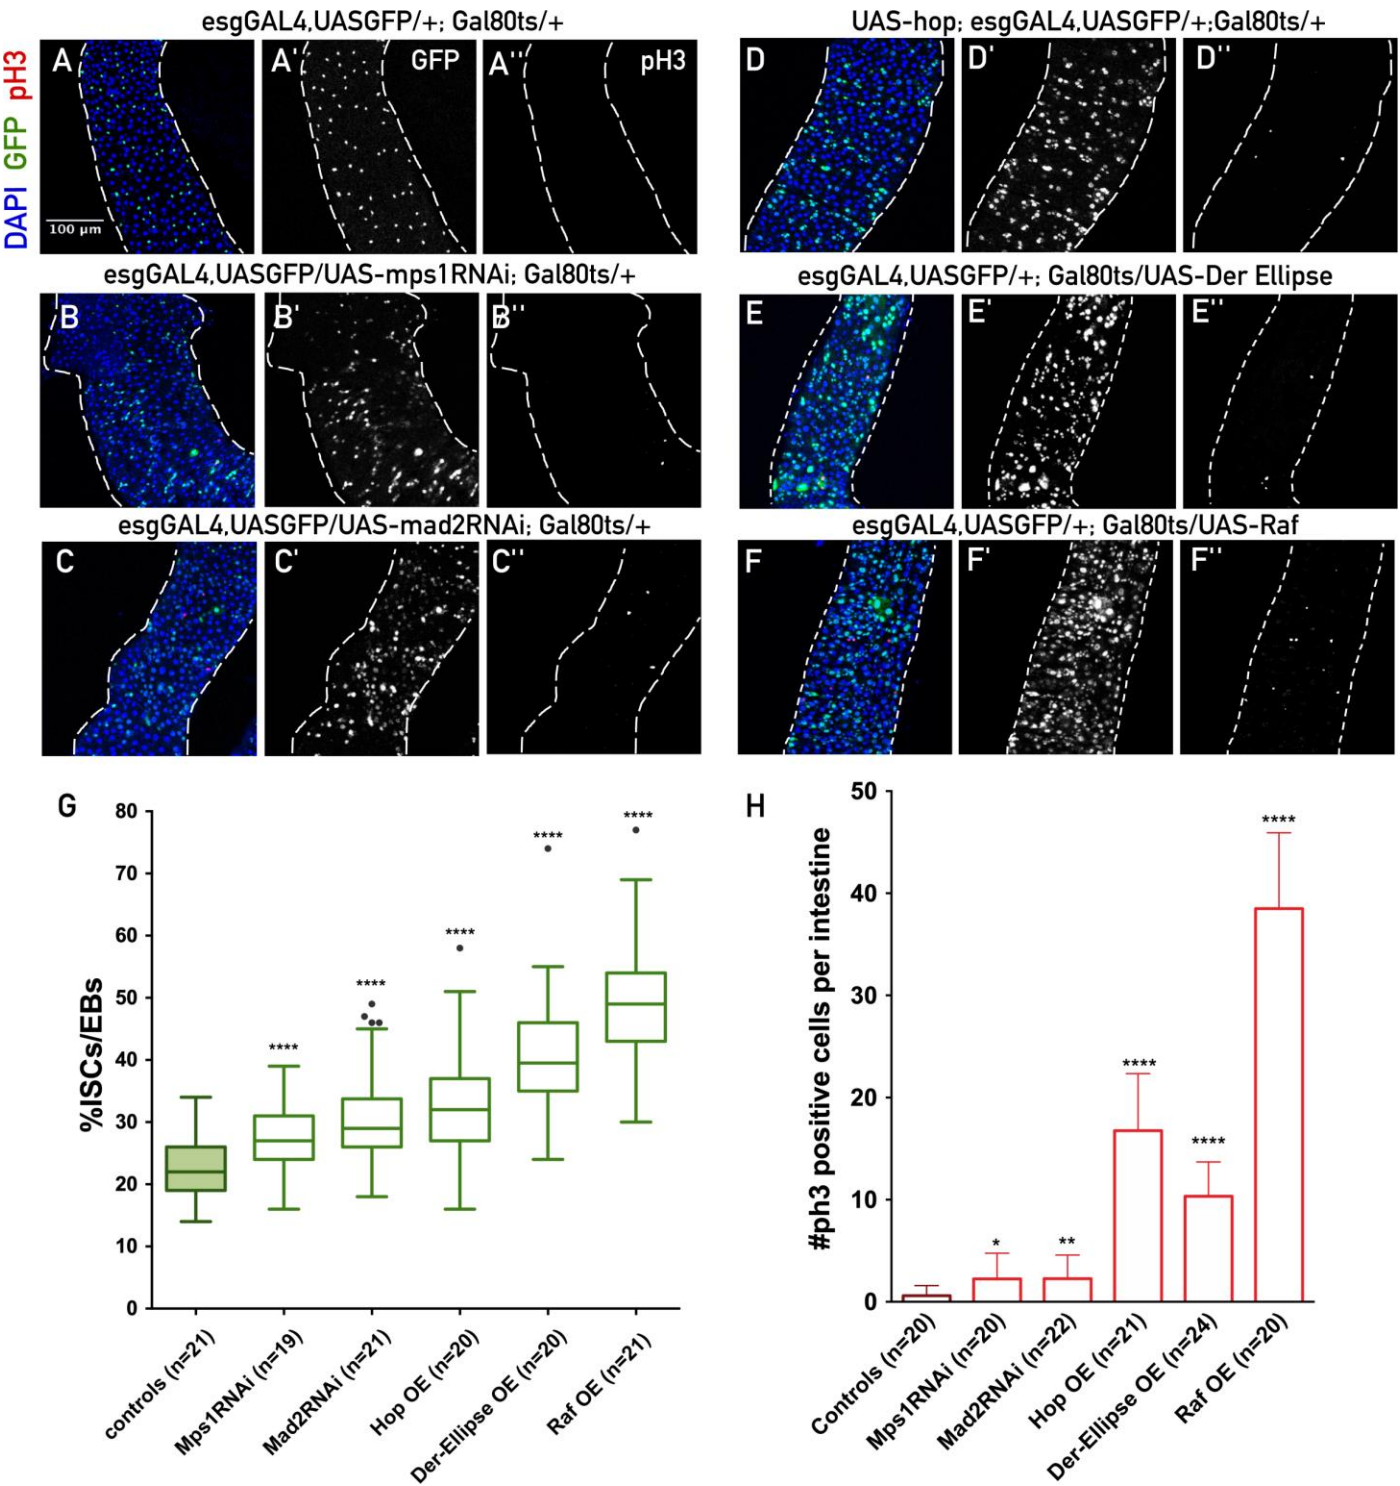

**Figure 1. Aneuploidy induction in ISC/EBs leads to intestinal dysplasia milder than the one observed upon EGFR or JAK-STAT pathways misregulation. A)** Control intestines after 10 days at 29°C, ISC/EBs are GFP positive (green, A', *esgGal4,UASGFP*) and mitotic cells are stained for phospho-histone H3 (red, A'', no positive cells in this image); **B) and C)** Intestines where aneuploidy was induced in ISC/EBs during 10 days at 29°C by expressing UAS-mad2RNAi or UAS-mps1RNAi; **D) to F)** Intestines where EGFR or JAK-STAT pathways were manipulated in ISC/EBs during 10 days at 29°C by expressing



UAS-hop, UAS-der-Ellipse or UAS-raf; **G**) Quantification of the percentage of ISCs/EBs per total cells (DAPI) in A) to F); **H**) Quantification of number of mitotic cells (pH3 positive) in A) to F); All images are in the same magnification. \* p-value  $\leq 0.05$ , \*\* p-value  $\leq 0.01$ , \*\*\*\* p-value  $\leq 0.0001$ , Mann–Whitney *U* test.

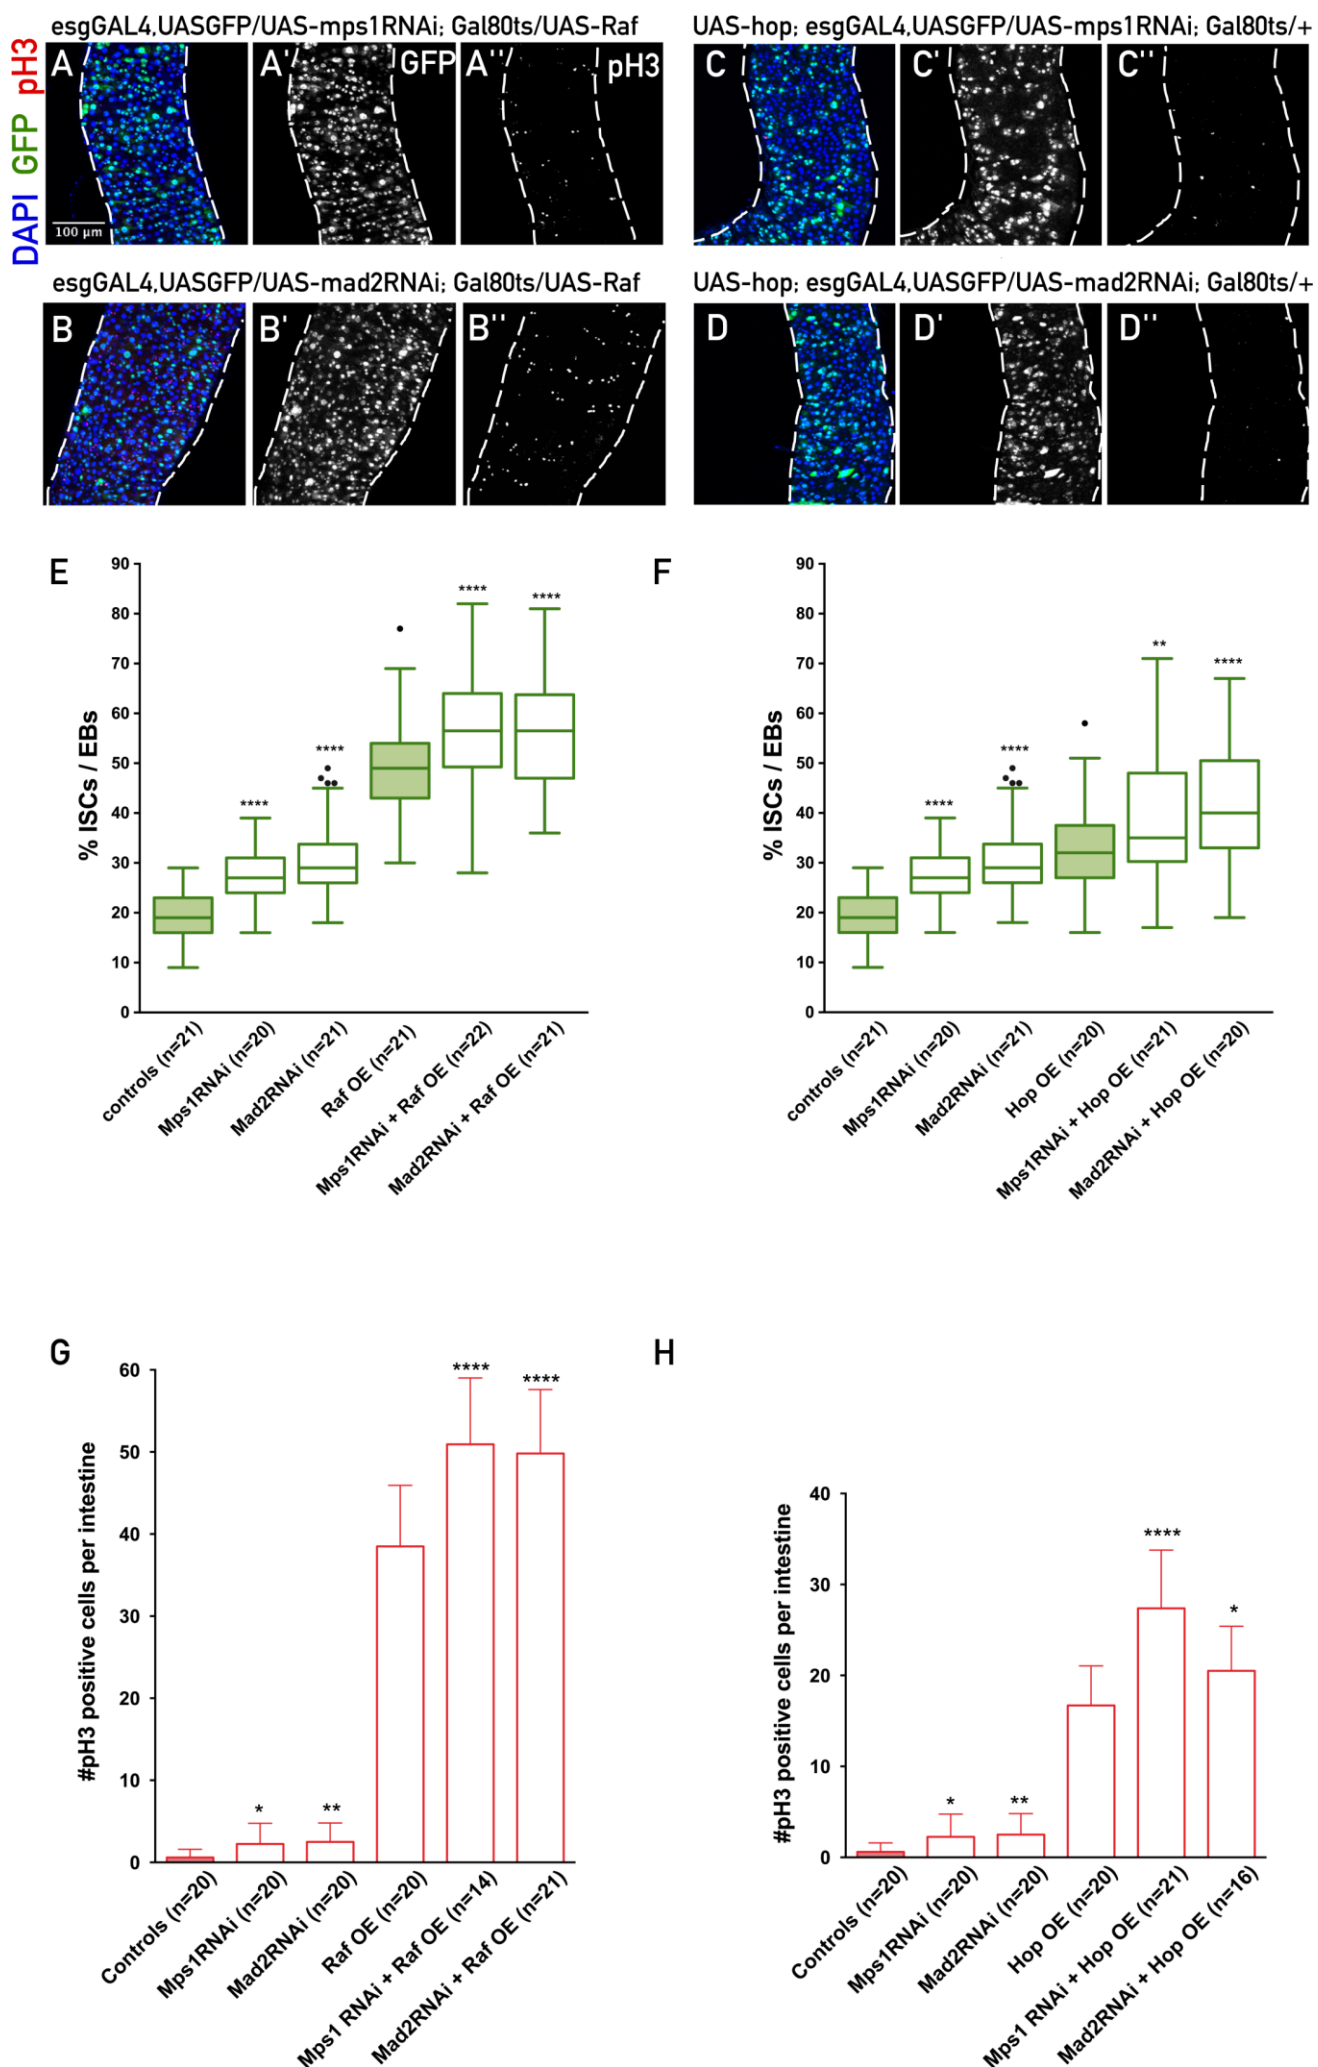

**Figure 2. Aneuploidy induction in ISCs/EBs potentiates the development of EGFR and JAK-STAT dysplastic phenotypes in the midgut. A) and B)** Intestines where EGFR pathway was misregulated in ISCs/EBs through expression of UAS-raf, during 10 days at 29°C, with a simultaneous induction of aneuploidy either by expressing UAS-mad2RNAi or UAS-mps1RNAi; **B) and C)** Intestines where JAK-STAT pathway was misregulated in ISCs/EBs through expression of UAS-hop, during 10 days at 29°C, with a simultaneous induction of aneuploidy either by expressing UAS-mad2RNAi or UAS-mps1RNAi; **E) and F)** Quantification of the percentage of ISCs/EBs per total cells (DAPI) in controls and A) to D) (data from controls, Mps1RNAi and Mad2RNAi is the same as in Figure 1); **G) and H)** Quantification of number of mitotic cells (pH3 positive) in controls and A) to D) (data from controls, Mps1RNAi and Mad2RNAi is the same as in Figure 1); All images are in the same magnification. For statistical analysis, Mps1RNAi and Mad2RNAi were compared with controls, and Mps1RNAi+Raf OE and Mad2RNAi+Raf OE were compared with Raf OE; \* p-value  $\leq 0.05$ , \*\* p-value  $\leq 0.01$ , \*\*\*\* p-value  $\leq 0.0001$ , Mann–Whitney *U* test.

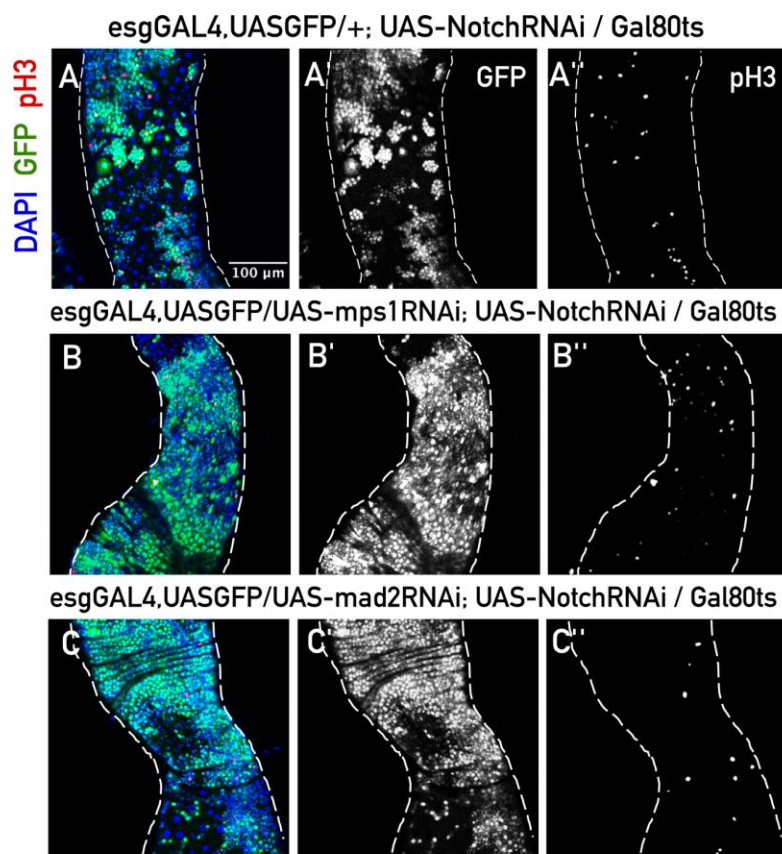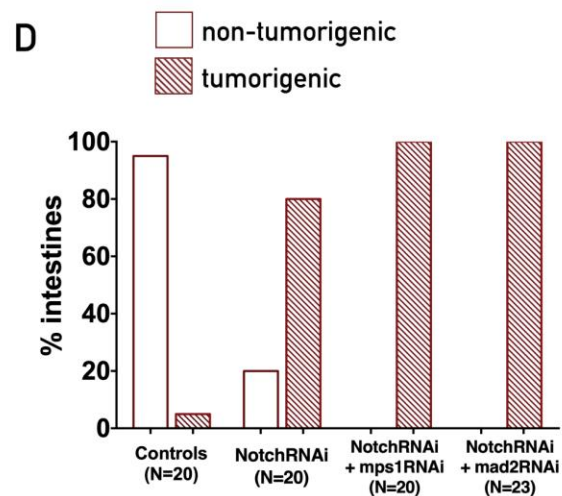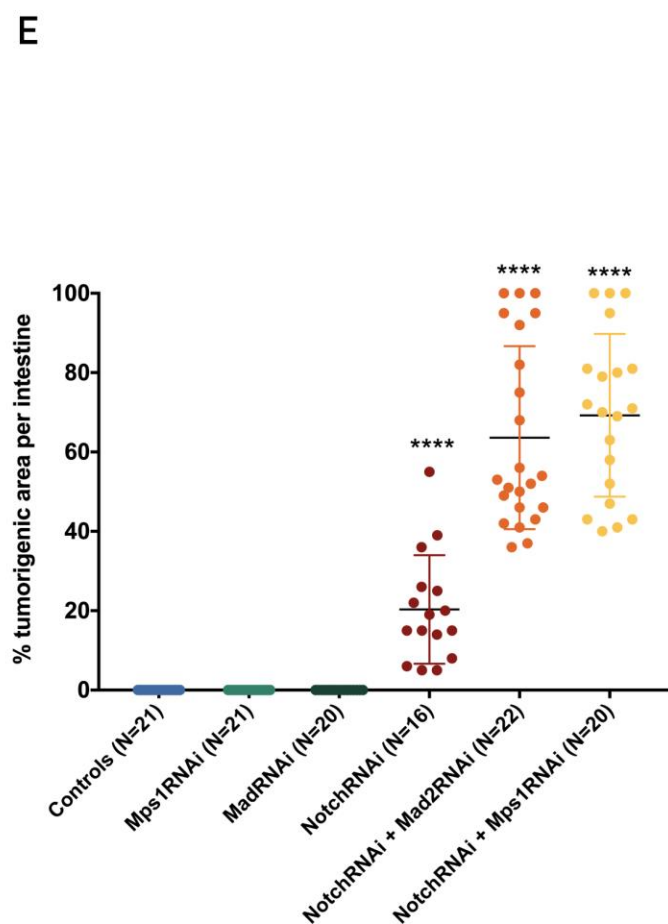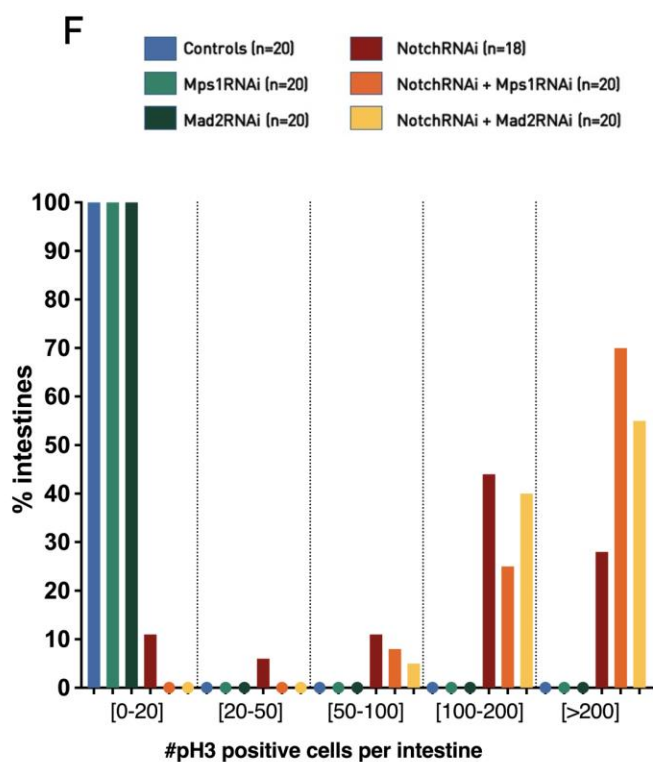

**Figure 3. Aneuploidy induction in ISCs/EBs potentiates the development of tumorigenic phenotypes upon Notch downregulation.** **A)** Intestine where Notch pathway was downregulated in ISCs/EBs through expression of UAS-notchRNAi, during 10 days at 29°C; **B) and C)** Intestines where Notch pathway was downregulated in ISCs/EBs through expression of UAS-notchRNAi, during 10 days at 29°C, with a simultaneous induction of aneuploidy either by expressing UAS-mad2RNAi or UAS-mps1RNAi; **D)** Percentage of intestines presenting a tumorigenic appearance in controls (for image see Figure 1) and conditions described in A) to C); **E)** Percentage of tumorigenic area (ISCs/EBs clusters) per total area of the midgut analysed in controls (for image see Figure 1) and A) to C); Note that for Mad2RNAi and Mps1RNAi conditions although a high number of ISCs/EBs were observed, areas of large clusters of these cells were not found, so the percentage of tumorigenic area was considered zero for both conditions; **F)** Percentage of intestines with 0-20, 20-50, 50-100 or >200 mitotic cells (pH3 positive) in controls (for image see Figure 1 A) and in A) to C); All images are in the same magnification; For statistical analysis, NotchRNAi was compared with controls, and NotchRNAi+Mps1RNAi and NotchRNAi+Mad2RNAi were compared with NotchRNAi; \*\*\*\* p-value  $\leq 0.0001$ , Mann–Whitney *U* test.



## Supplemental Figures

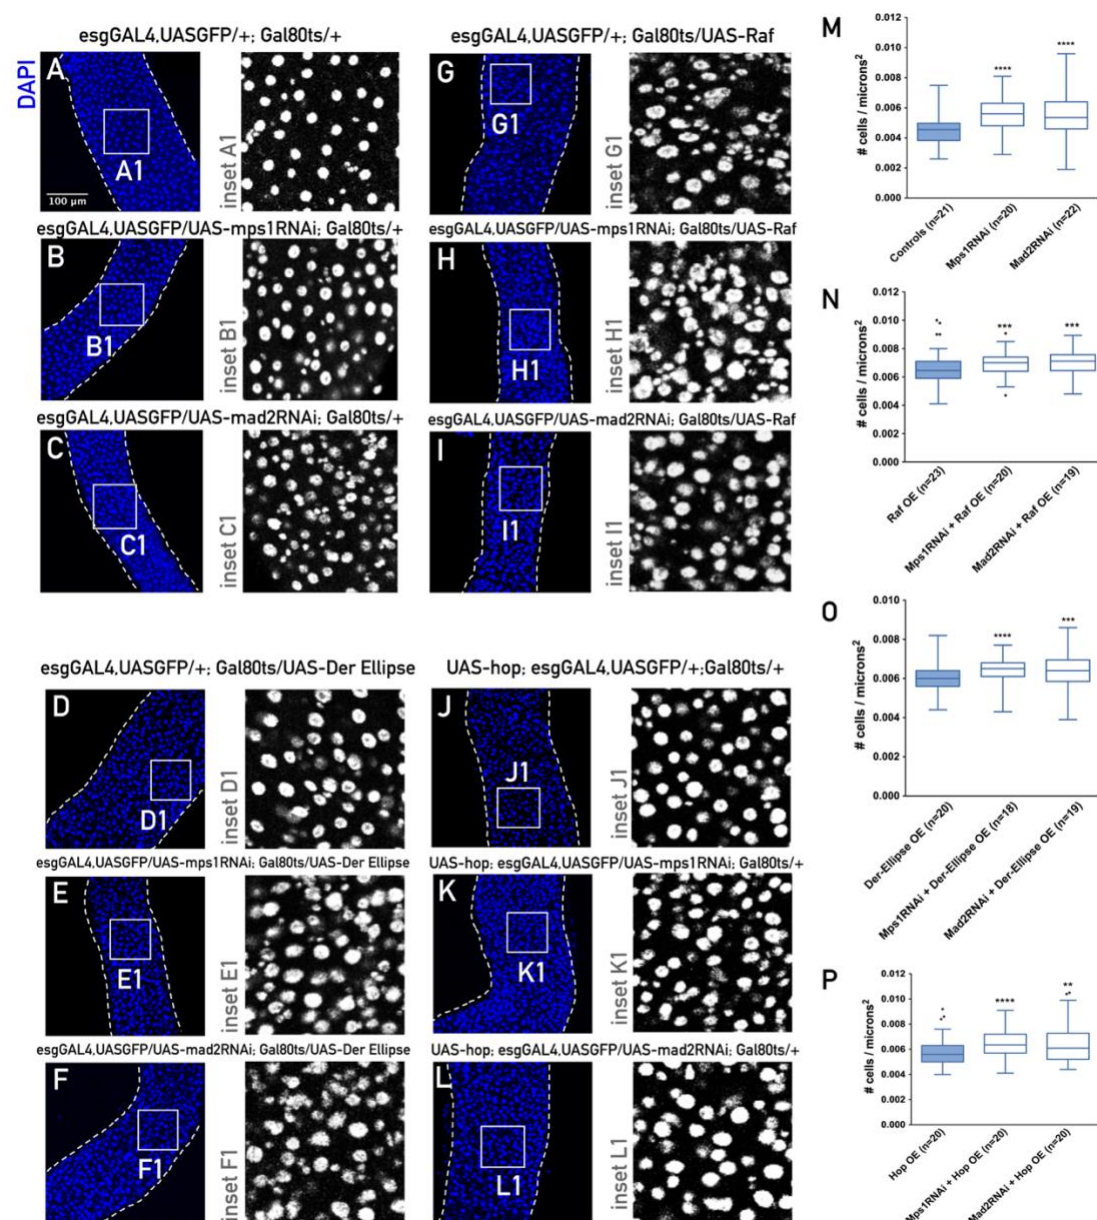

**Figure S1. Aneuploidy induction in ISCs/EBs leads to higher tissue cell density when induced in homeostatic intestines and aggravates tissue cell density in intestines developing dysplastic phenotypes upon EGRF or JAK-STAT manipulation. A) Control 10 day-old intestine; B) and C) 10 day-old Intestines where aneuploidy was induced via SAC impairment; D) and L) 10 day-old Intestines where dysplasia was induced via manipulation of EGFR or JAK-STAT pathways, with and without simultaneous induction of aneuploidy via SAC impairment. M) to P) Quantification of numbers of cells (DAPI) per area in situations A) to L); All images are in the same magnification. \* p-value ≤ 0.05, \*\* p-value ≤ 0.01, \*\*\*\* p-value ≤ 0.0001, \*\*\*\* p-value ≤ 0.0001, Mann-Whitney U test.**

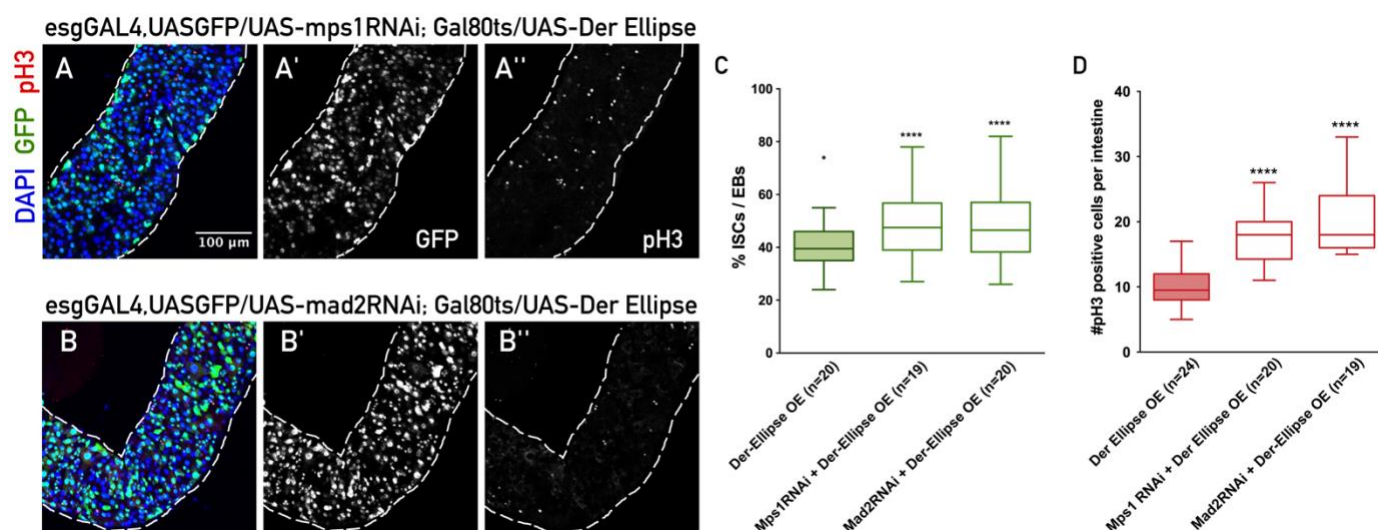

**Figure S2. Aneuploidy induction in ISCs/EBs potentiates the development of dysplasia mediated by UAS-der-Ellipse over-expression.** **A) and B)** Intestine where EGFR pathway was activated in ISCs/EBs via expression of UAS-der-Ellipse, during 10 days at 29°C with a simultaneous induction of aneuploidy either by expressing UAS-mad2RNAi or UAS-mps1RNAi; compared with expression of UAS-der-Ellipse alone and controls in Figure 1. **C)** Quantification of the percentage of ISCs/EBs per total cells (DAPI) in situations A) to B). **D)** Quantification of number of mitotic cells (pH3 positive) in situations A) to F); All images are in the same magnification. \* p-value  $\leq 0.05$ , \*\*\*\* p-value  $\leq 0.0001$  Mann–Whitney *U* test.
